# Supplementary material
Source: PubMed Central journal article supplement (PMC9119408)
Supplement: NIHMS1792928-supplement-Sup_Fig_1-4.pdf [file NIHMS1792928-supplement-Sup_Fig_1-4.pdf]

## Supplementary Figure 1

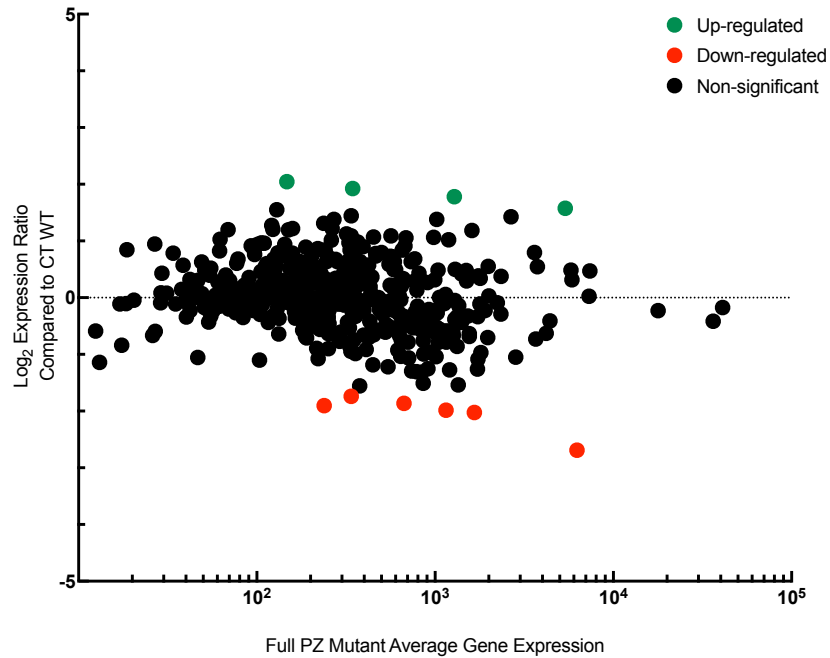

**Supplementary Figure 1. MA plot comparison of the Full PZ mutant gene expression to wild-type *C. trachomatis*.** A) Only 10 genes were differentially regulated in the Full PZ mutant. These comparisons do not include the genes in the region of recombination with *C. muridarum*. Genes that are significantly up-regulated are highlighted in green; genes that are significantly down-regulated are highlighted in red. Significant regulation was determined by gene expression comparison ratios more than two standard deviations from the gene expression ratio average between two RNAseq runs.

## Supplementary Figure 2

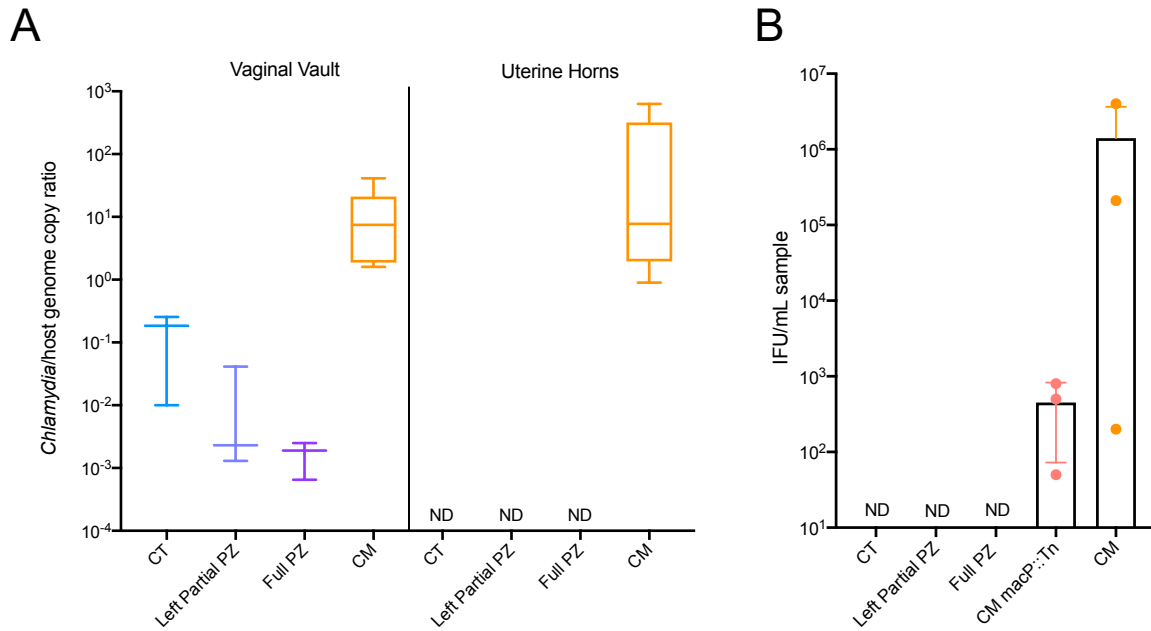

**Supplementary Figure 2. Additional mouse models to analyze the virulence and pathogenesis of the PZ chimeras.** A) C3He/J mice were infected with 10<sup>5</sup> IFU intravaginally and organs were harvested at day 7. Bacterial burdens were assessed using ddPCR to compare genome copies of *Chlamydia* to host at each tissue (n>3). ND means not detectable when compared to mock infection false positive levels. B) C57Bl/6 mice were infected with 10<sup>5</sup> IFU intrarectally and rectal swabs were collected 7 days post-infection. The Right Partial PZ mutant was not able to be tested in these models.

### Supplementary Figure 3

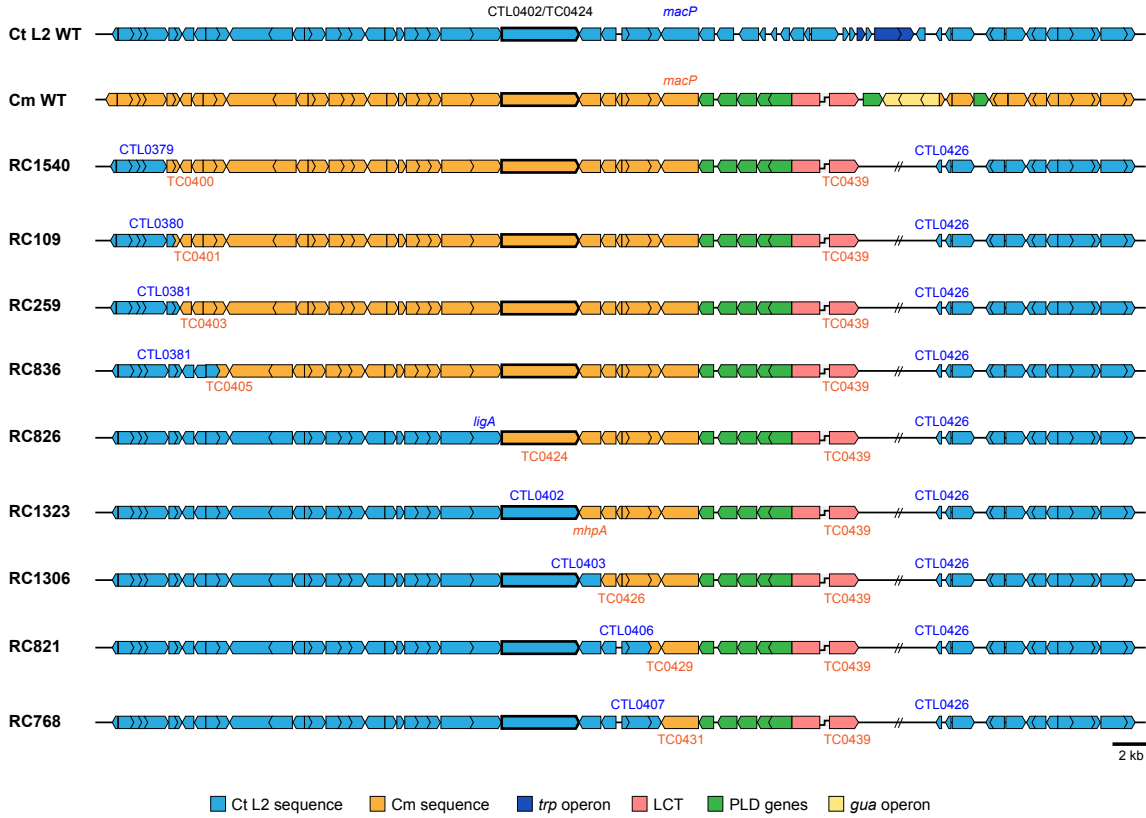

**Supplementary Figure 3. Schematic representations of the extended left end chimeras.** Gene maps for the parental strains; wildtype *C. muridarum*, and wildtype *C. trachomatis* L2/tet, and the chimeras, RC#. Genes in blue are from *C. trachomatis* while orange genes represent those recombined from *C. muridarum*. Related plasticity zone genes share colors including: *trp* operon (dark blue), cytotoxins (pink), phospholipase D genes (green) and the *gua* operon (yellow). Genes with bold outlines correspond to the *CTL0402* or *TC0424* orthologs.

## Supplementary Figure 4

### Apoptosis Videos

**Supplementary Figure 4. Time lapse video microscopy of early lysis chimeras.** Live-cell images captured every 20 minutes from 16 hpi to 28 hpi of cells infected with either (A) *C. muridarum*, (B) *C. trachomatis*, (C) RC826, or (D) RC1323. Infected cells were imaged by brightfield microscopy using a 40X objective while maintained under an environment of 5% CO<sub>2</sub>, 37°C, and humidity.
